# Supplementary material for: Functional variation in allelic methylomes underscores a strong genetic contribution and reveals novel epigenetic alterations in the human epigenome
Source: Genome Biol. 2017 Mar 10;18:50. doi: 10.1186/s13059-017-1173-7 (PMC5346261; doi:10.1186/s13059-017-1173-7)
Supplement: Additional file 9: — ChromHMM state report. This file is the report generated after machine learning of the eight-state ChromHMM model. (PDF 261 kb) [file 13059_2017_1173_MOESM9_ESM.pdf]

# ChromHMM Report

Input Directory: output\_tchange\_muscle2

Output Directory: test\_out\_tchange\_muscle2\_8states

Number of States: 8

Assembly: hg19

Full ChromHMM command: LearnModel -p 4 -s 1234567890 output\_tchange\_muscle2  
test\_out\_tchange\_muscle2\_8states 8 hg19

## Model Parameters

### Emission Parameters

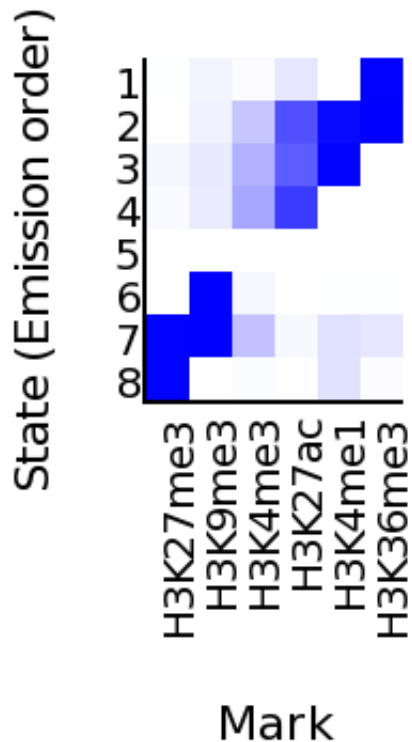

- [Emission Parameter SVG File](#)
- [Emission Parameter Tab-Delimited Text File](#)

## Transition Parameters

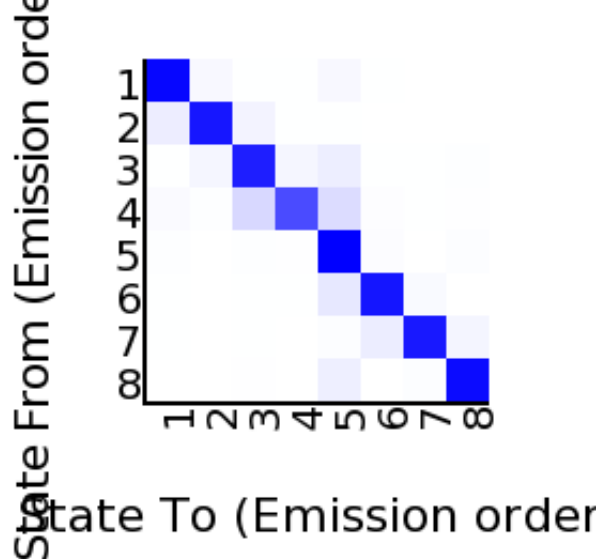

- [Transition Parameter SVG File](#)
- [Transition Parameter Tab-Delimited Text File](#)
- [All Model Parameters Tab-Delimited Text File](#)

## Genome Segmentation Files

- [Mono\\_8 Segmentation File \(Four Column Bed File\)](#)
- [Muscle\\_8 Segmentation File \(Four Column Bed File\)](#)
- [TC\\_8 Segmentation File \(Four Column Bed File\)](#)

Custom Tracks for loading into the [UCSC Genome Browser](#):

- [Mono\\_8 Browser Custom Track Dense File](#)
- [Mono\\_8 Browser Custom Track Expanded File](#)
- [Muscle\\_8 Browser Custom Track Dense File](#)
- [Muscle\\_8 Browser Custom Track Expanded File](#)
- [TC\\_8 Browser Custom Track Dense File](#)
- [TC\\_8 Browser Custom Track Expanded File](#)

## State Enrichments

### Mono\_8 Enrichments

## Fold Enrichment Mono\_8

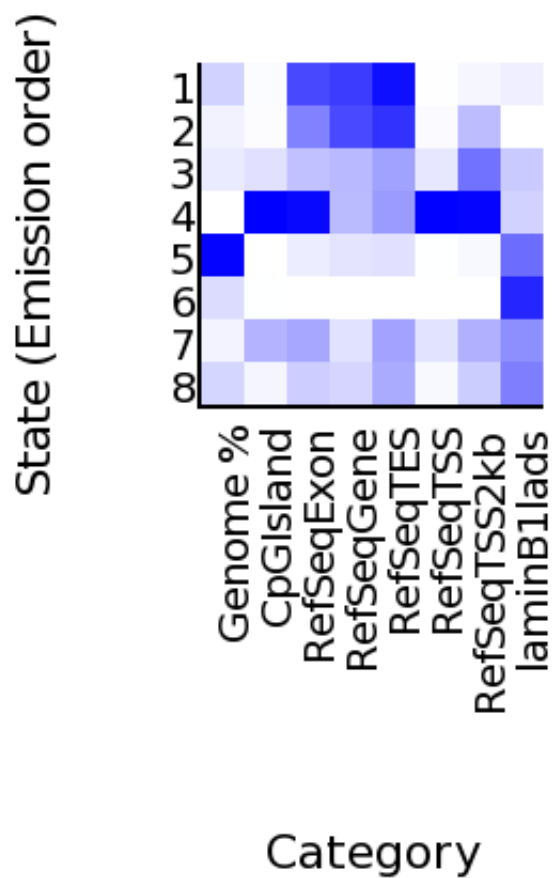

- [Mono\\_8 Overlap Enrichment SVG File](#)
- [Mono\\_8 Overlap Enrichment Tab-Delimited Text File](#)

## Fold Enrichment Mono\_8 RefSeqTES

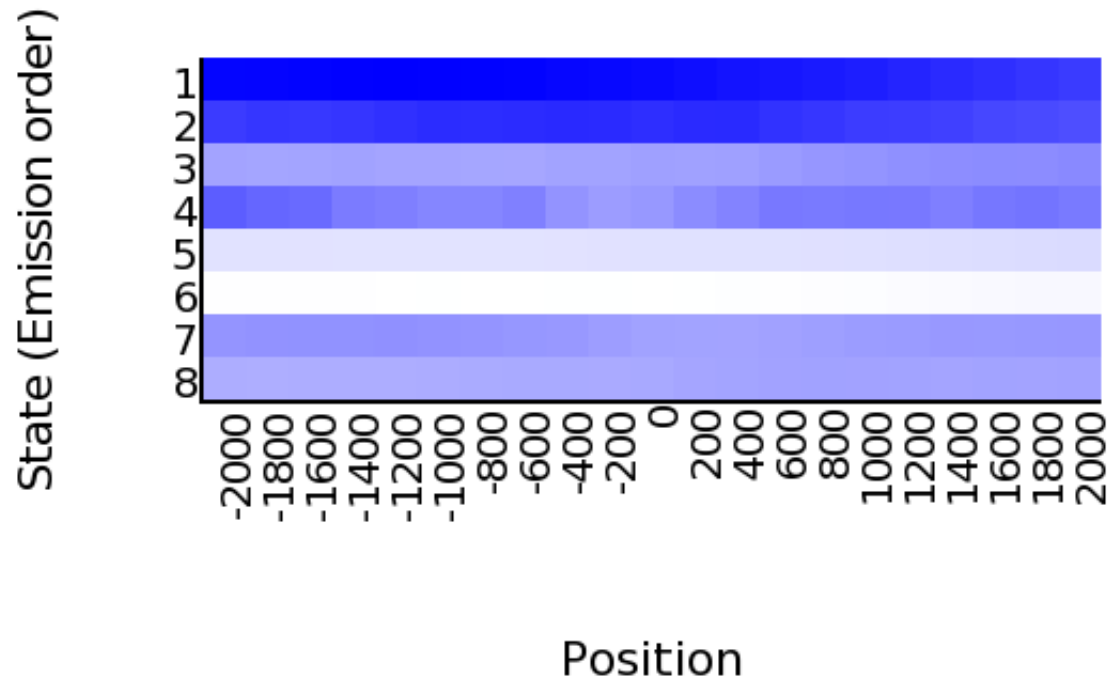

- [Mono\\_8 RefSeqTES\\_neighborhood Enrichment SVG File](#)
- [Mono\\_8 RefSeqTES\\_neighborhood Enrichment Tab-Delimited Text File](#)

## Fold Enrichment Mono\_8 RefSeqTSS

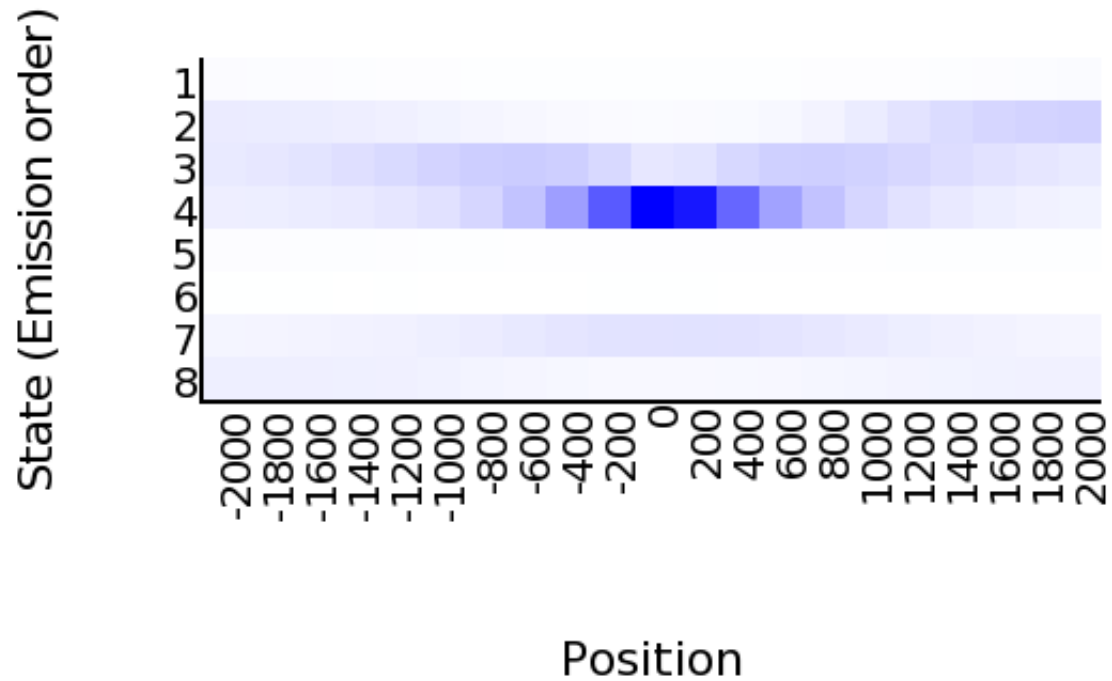

- [Mono\\_8 RefSeqTSS\\_neighborhood Enrichment SVG File](#)
- [Mono\\_8 RefSeqTSS\\_neighborhood Enrichment Tab-Delimited Text File](#)

## Muscle\_8 Enrichments

## Fold Enrichment Muscle\_8

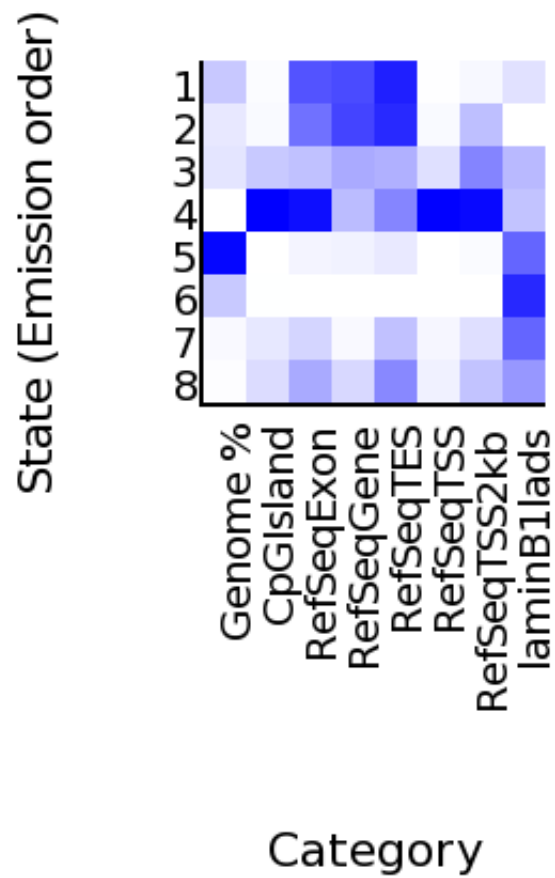

- [Muscle\\_8 Overlap Enrichment SVG File](#)
- [Muscle\\_8 Overlap Enrichment Tab-Delimited Text File](#)

## Fold Enrichment Muscle\_8 RefSeqTES

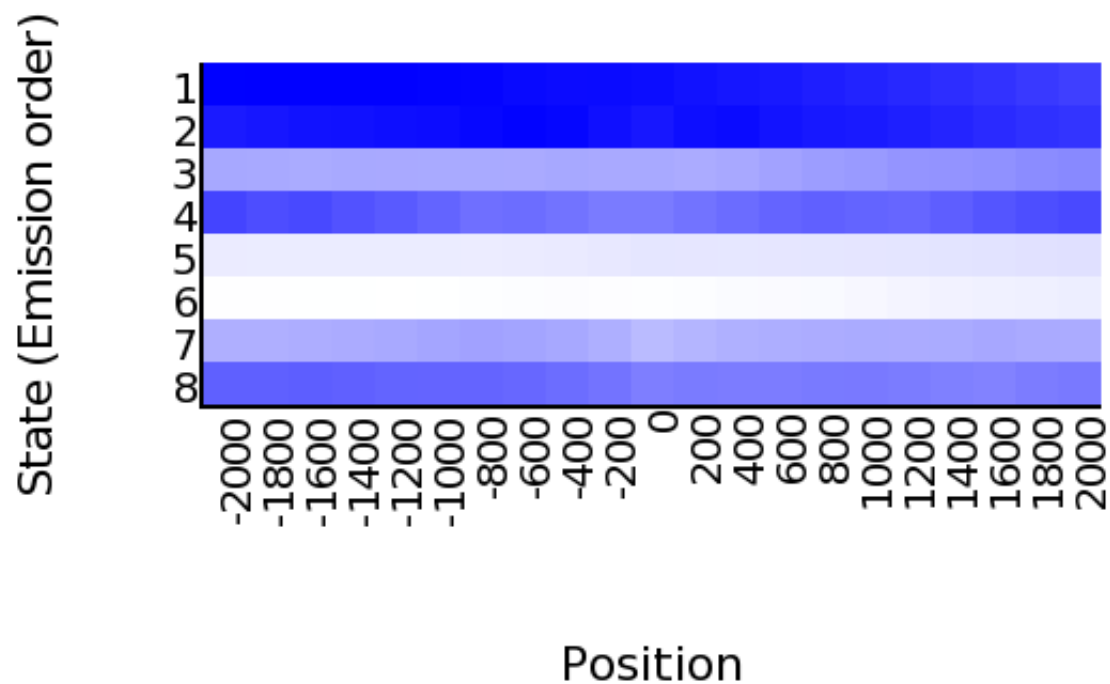

- [Muscle\\_8\\_RefSeqTES\\_neighborhood Enrichment SVG File](#)
- [Muscle\\_8\\_RefSeqTES\\_neighborhood Enrichment Tab-Delimited Text File](#)

## Fold Enrichment Muscle\_8 RefSeqTSS

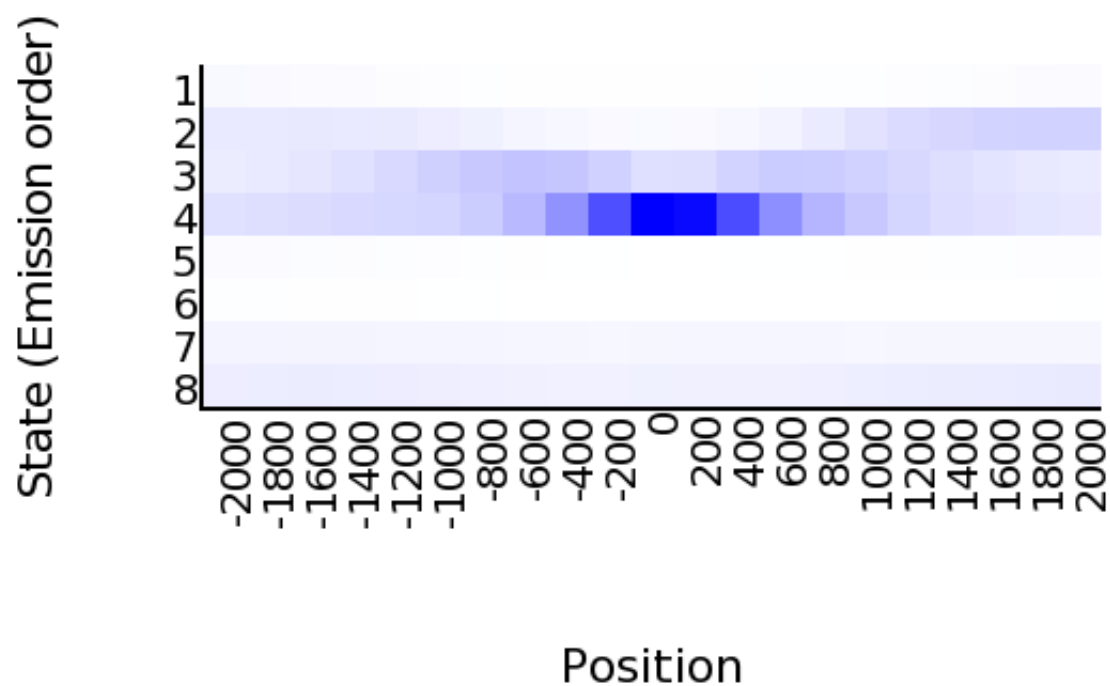

- [Muscle\\_8\\_RefSeqTSS\\_neighborhood Enrichment SVG File](#)
- [Muscle\\_8\\_RefSeqTSS\\_neighborhood Enrichment Tab-Delimited Text File](#)

## TC\_8 Enrichments

## Fold Enrichment TC\_8

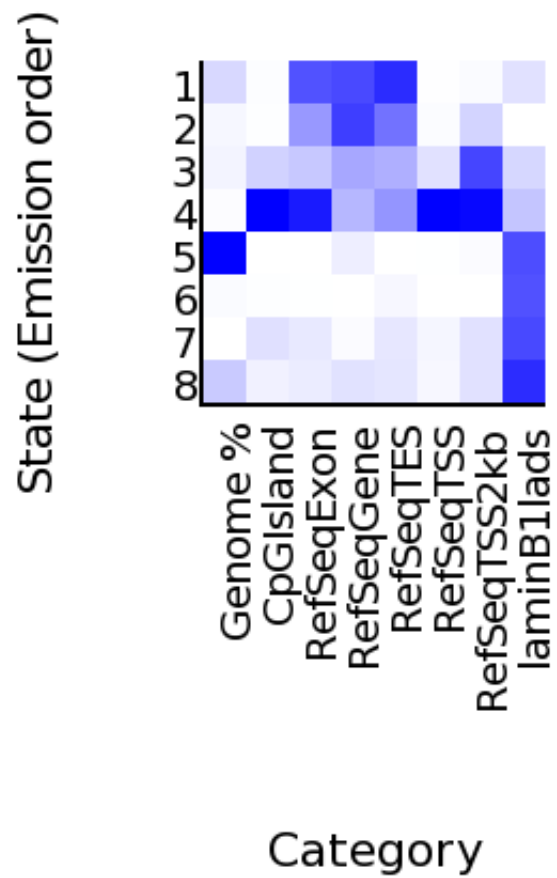

- [TC\\_8 Overlap Enrichment SVG File](#)
- [TC\\_8 Overlap Enrichment Tab-Delimited Text File](#)

## Fold Enrichment TC\_8 RefSeqTES

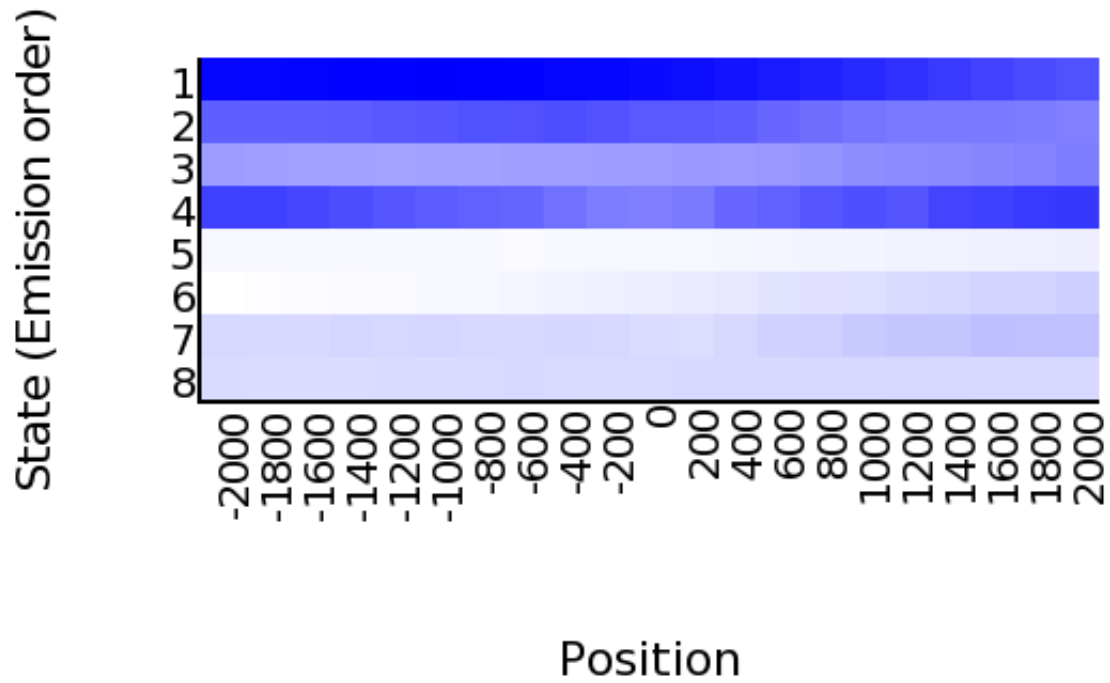

- [TC\\_8\\_RefSeqTES\\_neighborhood Enrichment SVG File](#)
- [TC\\_8\\_RefSeqTES\\_neighborhood Enrichment Tab-Delimited Text File](#)

## Fold Enrichment TC\_8 RefSeqTSS

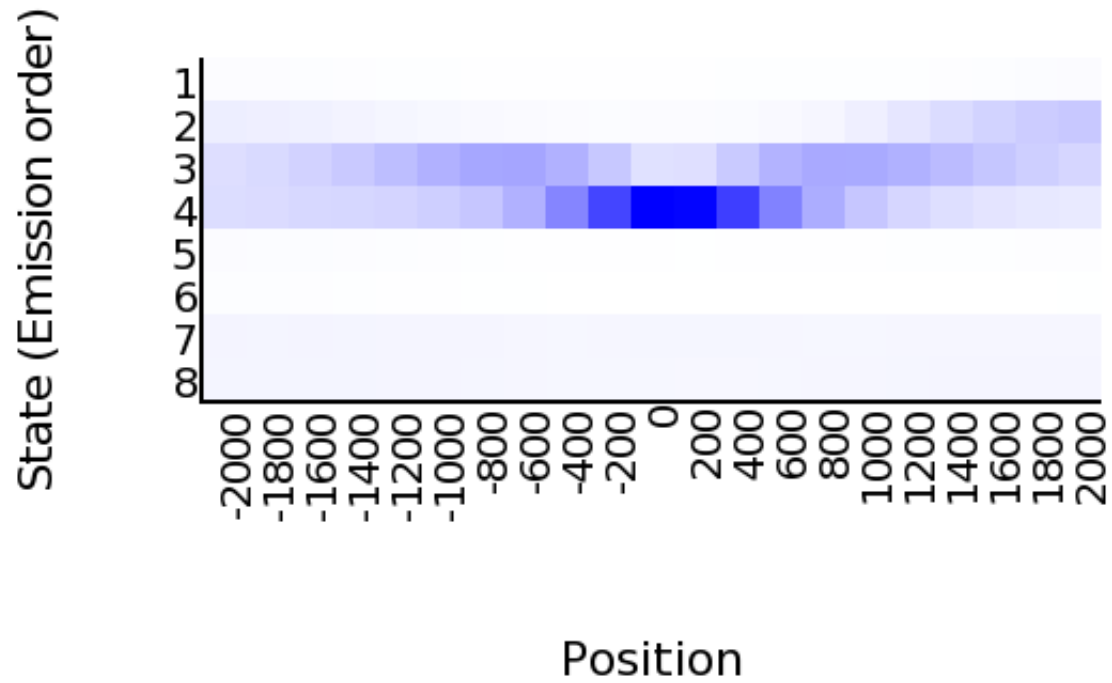

- [TC\\_8\\_RefSeqTSS\\_neighborhood Enrichment SVG File](#)
- [TC\\_8\\_RefSeqTSS\\_neighborhood Enrichment Tab-Delimited Text File](#)
